# Supplementary material
Source: PubMed Central journal article supplement (PMC6348068)
Supplement: 10802_2018_410_MOESM2_ESM.pdf [file 10802_2018_410_MOESM2_ESM.pdf]

**Early origins of autism comorbidity: Neuropsychiatric traits correlated in childhood are independent in infancy, *Journal of Abnormal Child Psychology***

**Online Resource 2**

Participant [percent of sample (%), number of individuals ( $n_{\text{twins}}$ )] and response [mean, standard deviation (SD), range] characteristics at 18 and 36 months

|                                        | 18 months    |                    | 36 months    |                    |
|----------------------------------------|--------------|--------------------|--------------|--------------------|
|                                        | %            | $n_{\text{twins}}$ | %            | $n_{\text{twins}}$ |
| Gender                                 |              |                    |              |                    |
| Male                                   | 49.36        | 155                | 50.00        | 111                |
| Female                                 | 50.64        | 159                | 50.00        | 111                |
| Zygoty                                 |              |                    |              |                    |
| Monozygous                             | 34.4         | 108                | 23.4         | 52                 |
| Dizygous                               | 60.5         | 190                | 72.1         | 160                |
| Same sex dizygous                      | 37.6         | 118                | 44.1         | 98                 |
| Opposite sex dizygous                  | 22.9         | 72                 | 27.9         | 62                 |
| Unknown                                | 5.1          | 16                 | 4.5          | 10                 |
| Income                                 |              |                    |              |                    |
| <\$29,999                              | 16.6         | 52                 | 8.1          | 18                 |
| \$30,000-\$59,999                      | 25.5         | 80                 | 14.4         | 32                 |
| \$60,000-\$89,999                      | 24.2         | 76                 | 18.0         | 40                 |
| \$90,000-\$119,999                     | 17.8         | 56                 | 15.3         | 34                 |
| \$120,000-\$149,999                    | 7.6          | 24                 | 4.5          | 10                 |
| \$150,000-\$179,999                    | 2.5          | 8                  | 4.5          | 10                 |
| \$180,000-\$209,999                    | 2.5          | 8                  | 4.5          | 10                 |
| \$210,000-249,999                      | 1.3          | 4                  | 1.8          | 4                  |
| >\$250,000                             | 0.6          | 2                  | 0.9          | 2                  |
| Unknown                                | 1.3          | 4                  | 27.9         | 62                 |
| Race                                   |              |                    |              |                    |
| American Indian/Alaska Native          | 0.0          | 0                  | 0.0          | 0                  |
| Asian                                  | 1.3          | 4                  | 1.8          | 4                  |
| Black/African-American                 | 8.3          | 26                 | 8.1          | 18                 |
| Caucasian                              | 79.0         | 248                | 80.2         | 178                |
| Native Hawaiian/Other Pacific Islander | 0.0          | 0                  | 0.0          | 0                  |
| Mixed race                             | 10.8         | 34                 | 9.9          | 22                 |
| Unknown/Other                          | 0.6          | 2                  | 0.0          | 0                  |
| Ethnicity                              |              |                    |              |                    |
| Hispanic                               | 7.0          | 22                 | 5.4          | 12                 |
| Non-Hispanic                           | 91.1         | 286                | 92.8         | 206                |
| Unknown                                | 1.9          | 6                  | 1.8          | 4                  |
|                                        | Mean (SD)    | Range              | Mean (SD)    | Range              |
| Age in months                          | 18.68 (1.01) | 17-23              | 35.69 (.61)  | 35-39              |
| vrRSB (18 mo)/SRS-2 (36 mo)            |              |                    |              |                    |
| RSB (total) score                      | 21.75 (9.81) | 6-82               | 27.22 (17.9) | 0-147              |
| SCI                                    | 20.09 (8.1)  | 4-65               | 24.00 (14.7) | 0-115              |

|                             |              |      |             |      |
|-----------------------------|--------------|------|-------------|------|
| RRB                         | 1.67 (2.81)  | 0-19 | 3.22 (3.86) | 0-32 |
| BITSEA (18 mo)/CBCL (36 mo) |              |      |             |      |
| Behavior Prob/Externalizing | 7.56 (5.01)  | 0-34 | 4.30 (4.47) | 0-26 |
| Competence/Internalizing    | 16.97 (2.95) | 4-22 | 6.45 (6.16) | 0-35 |

The gender ratio in this study did not differ compared to Missouri twins born between September and December 2011 and August and December of 2012, the source populations for the present sample ( $\chi^2 = 0.250$ ,  $df = 1$ ,  $p = .617$ ). Median household income for the present sample was higher than the Missouri median of \$47,202, falling between \$60,000 and \$89,999. Racial breakdown likewise differed from the Missouri population ( $\chi^2 = 128.96$ ,  $df = 3$ ,  $p = .000$ ; due to limited observations, American Indian/Alaska Native, Asian, Native Hawaiian/Other Pacific Islander, and Unknown/Other were merged into a single cell). Ethnic composition did not significantly differ ( $\chi^2 = 0.003$ ,  $df = 1$ ,  $p = .958$ ). Raw scores are reported for behavioral assessments; RSB = reciprocal social behavior, SCI = social communication and interaction, RRB = restricted interests and repetitive behavior
