# Supplementary material
Source: PubMed Central journal article supplement (PMC6348068)

**Early origins of autism comorbidity: Neuropsychiatric traits correlated in childhood are independent in infancy, *Journal of Abnormal Child Psychology***

**Online Resource 6** Factor structure at baseline. The data were best described by a 2-factor model, with *SCI* and *Competence* comprising a “social adaptation” factor and *Dysregulation*, *Internalizing*, *Externalizing*, and *RRB* indices comprising a “behavior problems” factor

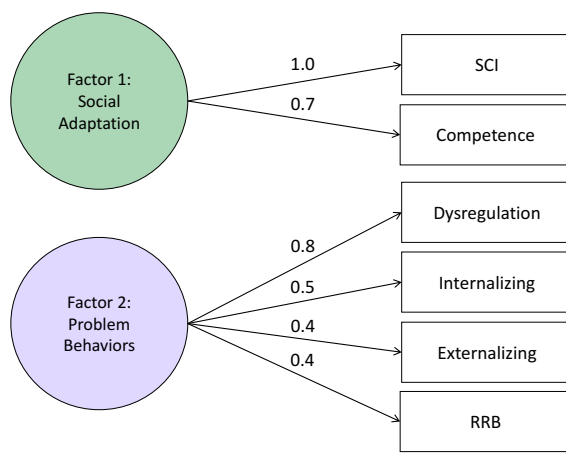

Supplement: 10802_2018_410_MOESM6_ESM.pdf [file 10802_2018_410_MOESM6_ESM.pdf]
