# Supplementary material
Source: PubMed Central journal article supplement (PMC6348068)
Supplement: 10802_2018_410_MOESM11_ESM.pdf [file 10802_2018_410_MOESM11_ESM.pdf]

## Early origins of autism comorbidity: Neuropsychiatric traits correlated in childhood are independent in infancy, *Journal of Abnormal Child Psychology*

**Online Resource 11** Longitudinal predictions of internalizing traits, externalizing traits, and QATs at 36 months from *Behavior Problem, Competence, and SCI* indices at 18 months

|                         | 1. Internalizing at 36 months |                                     |                                              | 2. Externalizing at 36 months |                                     |                                              | 3. QATs at 36 months   |                                |                                              | 4. QATs at 36 months (post-hoc) |                                |                                              |
|-------------------------|-------------------------------|-------------------------------------|----------------------------------------------|-------------------------------|-------------------------------------|----------------------------------------------|------------------------|--------------------------------|----------------------------------------------|---------------------------------|--------------------------------|----------------------------------------------|
|                         | Step 1:<br>Problems           | Step 2:<br>Problems +<br>Competence | Step 3:<br>Problems +<br>SCI +<br>Competence | Step 1:<br>Problems           | Step 2:<br>Problems +<br>Competence | Step 3:<br>Problems +<br>SCI +<br>Competence | Step 1:<br>SCI         | Step 2:<br>SCI +<br>Competence | Step 3:<br>Problems +<br>SCI +<br>Competence | Step 1:<br>RSB                  | Step 2:<br>RSB +<br>Competence | Step 3:<br>Problems +<br>RSB +<br>Competence |
| Problems                |                               |                                     |                                              |                               |                                     |                                              |                        |                                |                                              |                                 |                                |                                              |
| <i>Estimate</i>         | 0.37***                       | 0.37***                             | 0.34***                                      | 0.30***                       | 0.30***                             | 0.30***                                      | NA                     | NA                             | 0.15**                                       | NA                              | NA                             | 0.11                                         |
| <i>SE</i>               | (.07)                         | (.07)                               | (.07)                                        | (.07)                         | (.07)                               | (.07)                                        | NA                     | NA                             | (.06)                                        | NA                              | NA                             | (.06)                                        |
| Competence              |                               |                                     |                                              |                               |                                     |                                              |                        |                                |                                              |                                 |                                |                                              |
| <i>Estimate</i>         | NA                            | -0.07                               | 0.01                                         | NA                            | 0.00                                | -0.01                                        | NA                     | -.22**                         | -.24**                                       | NA                              | -.17*                          | -.19*                                        |
| <i>SE</i>               | NA                            | (.07)                               | (.09)                                        | NA                            | (.07)                               | (.09)                                        | NA                     | (.08)                          | (.08)                                        | NA                              | (.08)                          | (.08)                                        |
| SCI/ RSB                |                               |                                     |                                              |                               |                                     |                                              |                        |                                |                                              |                                 |                                |                                              |
| <i>Estimate</i>         | NA                            | NA                                  | 0.14                                         | NA                            | NA                                  | -0.02                                        | 0.55***                | 0.41***                        | 0.35***                                      | 0.59***                         | 0.49***                        | 0.44***                                      |
| <i>SE</i>               | NA                            | NA                                  | (.09)                                        | NA                            | NA                                  | (.09)                                        | (.06)                  | (.08)                          | (.08)                                        | (.06)                           | (.07)                          | (.08)                                        |
| AIC                     | 475.98                        | 477.05                              | 476.52                                       | 486.69                        | 488.69                              | 490.62                                       | 541.26                 | 536.23                         | 532.30                                       | 524.58                          | 521.52                         | 520.41                                       |
| BIC                     | 488.86                        | 493.15                              | 495.84                                       | 499.57                        | 504.79                              | 509.95                                       | 554.83                 | 553.19                         | 552.67                                       | 538.15                          | 538.49                         | 540.77                                       |
| Log Likelihood          | -233.99                       | -233.52                             | -232.26                                      | -239.34                       | -239.34                             | -239.31                                      | -266.6                 | -263.11                        | -260.15                                      | -258.3                          | -255.76                        | -254.21                                      |
| Num. obs                | 185                           | 185                                 | 185                                          | 185                           | 185                                 | 185                                          | 220                    | 220                            | 220                                          | 220                             | 220                            | 220                                          |
| Num. groups:            | 96                            | 96                                  | 96                                           | 96                            | 96                                  | 96                                           | 111                    | 111                            | 111                                          | 111                             | 111                            | 111                                          |
| Twin pairs (Intercept)  |                               |                                     |                                              |                               |                                     |                                              |                        |                                |                                              |                                 |                                |                                              |
| Var:                    | 0.33                          | 0.35                                | 0.34                                         | 0.40                          | 0.40                                | 0.40                                         | 0.37                   | 0.37                           | 0.30                                         | 0.30                            | 0.31                           | 0.27                                         |
| Residual                | 0.47                          | 0.36                                | 0.46                                         | 0.47                          | 0.47                                | 0.47                                         | 0.38                   | 0.37                           | 0.39                                         | 0.38                            | 0.36                           | 0.38                                         |
| Marginal R <sup>2</sup> | 0.15                          | 0.15                                | 0.16                                         | 0.09                          | 0.09                                | 0.09                                         | 0.26                   | 0.29                           | 0.32                                         | 0.31                            | 0.33                           | 0.35                                         |
| Model comparisons       | Step 1 ><br>Step 2            | Step 2 ><br>Step 3                  |                                              | Step 1 ><br>Step 2            | Step 2 ><br>Step 3                  |                                              | Step 2 ><br>Step 1     | Step 3 ><br>Step 2             |                                              | Step 2 ><br>Step 1              | Step 2 ><br>Step 3             |                                              |
|                         | $\chi^2 = 0.9331$             | $\chi^2 = 2.5267$                   |                                              | $\chi^2 = 0.0000$             | $\chi^2 = 0.0626$                   |                                              | $\chi^2 = 7.0289^{**}$ | $\chi^2 = 5.9229^*$            |                                              | $\chi^2 = 5.0554^*$             | $\chi^2 = 3.1113$              |                                              |

\*\*\* p < 0.001, \*\* p < 0.01, \* p < 0.05;  $\chi^2$  = chi-squared; marginal R<sup>2</sup> = variance accounted for by fixed factors (i.e., Problems, Competence, RSB)
